# Supplementary material for: Diagnosis of Malnutrition According to GLIM Criteria Predicts Complications and 6-Month Survival in Cancer Outpatients
Source: MDPI journal article supplement (doi:10.3390/biomedicines10092201), 2022-09-06
Supplement: s1 [file s1]

**Supplemental Table S1.** Odds ratios for malnutrition-associated complications according to tumor location.

| Complication                             | Head & Neck      | Colorectal n=82  | Upper GI         |
|------------------------------------------|------------------|------------------|------------------|
|                                          | n=19             |                  | n=64             |
| Emergency Room admission                 | 0.61 [0.06;4.71] | 2.17 [0.82;6.01] | 1.92 [0.70;5.40] |
| Hospitalization                          | 3.26 [0.46;33.7] | 4.17 [1.48;12.2] | 3.50 [1.18;11.7] |
| Severe infection                         | 3.47 [0.36;112]  | 5.03 [1.54;17.7] | 1.88 [0.57;6.98] |
| Mild infection                           | 3.47 [0.36;112]  | 1.58 [0.58;4.28] | 1.08 [0.34;3.55] |
| Poor pain control                        | 0.29 [0.01;2.78] | 3.39 [1.23;9.62] | 5.51 [1.85;18.5] |
| Increase in opioid dosage                | 2.71 [0.41;21.5] | 4.17 [1.48;12.2] | 4.87 [1.58;17.6] |
| Toxicity                                 | 5.09 [0.46;172]  | 2.81 [0.45;74.6] | 3.36 [0.94;14.3] |
| Gastrointestinal toxicity                | 1.90 [0.29;14.5] | 1.01 [0.38;2.82] | 3.54 [1.27;10.5] |
| Hematological toxicity                   |                  | 1.14 [0.31;3.66] | 2.71 [0.96;8.19] |
| Neurological toxicity                    |                  | 1.00 [0.38;2.64] | 1.53 [0.53;4.66] |
| Decrease or discontinuation of treatment | 21.4 [2.14;747]  | 1.85 [0.58;7.34] | 2.68 [0.92;8.28] |
| Tumor Progression                        | 1.05 [0.14;7.54] | 1.71 [0.62;4.67] | 2.31 [0.79;7.26] |
| 6-month survival                         | 0.91 [0.08;7.94] | 0.17 [0.03;0.74] | 0.70 [0.22;2.14] |

**Supplemental Table S1.** Odds ratios for malnutrition-associated complications according to tumor location.

| Complication                            | Head & Neck | Colorectal n=82 | Upper GI |
|-----------------------------------------|-------------|-----------------|----------|
|                                         | n=19        |                 | n=64     |
| Odds ratio and 95% confidence intervals |             |                 |          |
